# Supplementary material for: Proactive Risk Assessment Using Failure Mode and Effects Analysis in a Management Model of Anesthetic Drugs and Class I Psychotropic Drugs in Inpatient Pharmacy: A Pilot Project
Source: Research Square preprint supplement (doi:10.21203/rs.3.rs-6090426/v1), 2025-05-12
Supplement: Supplementary file 1 [file 098c12df01dd37dd4f266691.xlsx]

## Sheet: 投1-5分
共线范畴	失效模式	失效原因	失效影响							严重性							发生率							可检测性
医生开立医嘱，打印处方	处方信息不完整	无患者身份信息 无代办人身份信息	患者无法及时用药	1	1	1	5	5	1	2.33333	2	4	3	2	2	2	2.5	3	1	1	1	1	1	1.33333	7.77778
	未使用规定的红处方	医生对药品分类不清楚	患者无法及时用药	2	1	2	5	5	2	2.83333	1	3	3	1	1	1	1.66667	1	1	2	1	1	1	1.16667	5.50926
	使用剂量不适宜	医生未按照相关规定住院患者按照日剂量开立医嘱	患者无法及时用药	3	2	2	5	5	2	3.16667	4	2	2	3	3	3	2.83333	1	3	2	1	1	1	1.5	13.4583
	使用频次不适宜	芬太尼透皮贴未按照72小时间隔频次给药	患者无法及时用药	3	1	2	3	4	3	2.66667	4	3	3	3	4	3	3.33333	3	1	2	1	1	1	1.5	13.3333
	给药途径不适宜	术中皮下注射药品开立为静脉点滴	患者无法及时用药	4	1	1	5	5	3	3.16667	1	1	1	1	1	2	1.16667	1	4	2	1	1	1	1.66667	6.15741
	诊断不完整	处方诊断仅提取诊断1	患者无法及时用药	2	1	3	5	3	3	2.83333	4	3	3	3	3	3	3.16667	2	2	2	1	1	1	1.5	13.4583
护士审核，传医嘱	无病人医嘱信息	护士忘记传医嘱	患者无法及时用药	1	1	1	5	3	2	2.16667	3	2	2	1	1	1	1.66667	1	1	2	1	1	1	1.16667	4.21296
护士携处方至药房取药	处方信息与HIS医嘱信息不一致	医生未将多余医嘱撤销 护士未将处方信息与医嘱信息核对	患者无法及时用药	3	2	3	5	5	2	3.33333	3	3	3	2	3	2	2.66667	2	1	2	1	1	1	1.33333	11.8519
药师审核处方并计费	发药信息与处方信息不一致	药师未认真将处方信息与医嘱信息核对	护士摆药与医嘱有误，患者不能及时用药	4	3	3	5	3	4	3.66667	3	3	3	1	1	1	2	2	3	2	1	1	1	1.66667	12.2222
发放药品	药品调配错误	相似药品未区分 发药单药品信息显示不清	护士摆药与医嘱有误，患者不能及时用药	5	5	1	5	5	5	4.33333	1	3	1	1	1	2	1.5	2	4	3	3	3	4	3.16667	20.5833
针剂或贴剂登记回收记录表	空安瓿回收记录登记不完全	取药信息数据量大，无法实时手工记录	空安瓿回收数量与发放数量不一致	3	2	2	5	5	5	3.66667	4	4	1	3	5	5	3.66667	5	4	1	1	1	5	2.83333	38.0926
护士取药，执行医嘱	医嘱执行错误	护士未执行“三查七对”	患者用药错误	5	5	1	5	5	5	4.33333	1	3	1	1	1	1	1.33333	1	5	1	1	1	1	1.66667	9.62963
将空安瓿/废贴交回药房，并在回收表上做记录	使用后的空安瓿/废贴回收不完全	药品使用后不能将空安瓿/废贴及时送回药房	空安瓿回收数量与发放数量不一致	3	2	2	4	3	5	3.16667	5	5	2	3	3	5	3.83333	3	4	1	1	1	5	2.5	30.3472
药师定期统计回收表上记录的空安瓿/废贴的数量，销毁并记录	记录与实际回收数量不一致	不能如实登记回收数量	空安瓿回收数量与发放数量不一致	3	2	1	5	5	5	3.5	5	5	1	2	2	5	3.33333	1	4	1	1	2	4	2.16667	25.2778
使用记录登记	人工记录药品使用记录过于繁杂	信息化数据不完整	人工投入过多	3	1	1	2	3	5	2.5	2	5	1	2	3	5	3	5	3	1	1	1	3	2.33333	17.5

## Sheet: 投票
共线范畴	失效模式	失效原因	失效影响	PRN	对策
医生开立医嘱，打印处方	处方信息不完整	无患者身份信息	患者无法及时用药		系统提醒医生讲患者基本信息填写完整，开立医嘱自动提取患者基本信息
		无代办人身份信息	患者无法及时用药		打印处方前弹框提醒补充信息
	未使用规定的红处方	医生对药品分类不清楚	患者无法及时用药		在HIS系统内增加麻醉药品和第一类精神药品标识
	使用剂量不适宜	医生未按照相关规定住院患者按照日剂量开立医嘱	患者无法及时用药		前置审核制订拦截措施
	使用频次不适宜	芬太尼透皮贴未按照72小时间隔频次给药	患者无法及时用药		前置审核制订拦截措施
	给药途径不适宜	术中皮下注射药品开立为静脉点滴	患者无法及时用药		前置审核制订拦截措施
	诊断不完整	处方诊断仅提取诊断1	患者无法及时用药		将所有病例内所有诊断均提取显示
护士审核，传医嘱	无病人医嘱信息	护士忘记传医嘱	患者无法及时用药		护士加强审核
护士携处方至药房取药	处方信息与HIS医嘱信息不一致	医生未将多余医嘱撤销	患者无法及时用药		医生及时撤销修改前的医嘱
		护士未将处方信息与医嘱信息核对	患者无法及时用药		护士加强核对
药师审核处方并计费	发药信息与处方信息不一致	药师未认真将处方信息与医嘱信息核对	护士摆药与医嘱有误，患者不能及时用药		药师加强培训
发放药品	药品调配错误	相似药品未区分	护士摆药与医嘱有误，患者不能及时用药		引进智能电子药柜，药品分区定位称重存放，发药信息自动传输电子药柜，药师根据电子药柜提示发放药品。
		发药单药品信息显示不清	护士摆药与医嘱有误，患者不能及时用药		电子信息代替纸质单据
针剂或贴剂登记回收记录表	空安瓿回收记录登记不完全	取药信息数据量大，无法实时手工记录	空安瓿回收数量与发放数量不一致		电子智能药柜可自动登记可回收的空安瓿/废贴信息
护士取药，执行医嘱	医嘱执行错误	护士未执行“三查七对”	患者用药错误		护士加强核对
将空安瓿/废贴交回药房，并在回收表上做记录	使用后的空安瓿/废贴回收不完全	药品使用后不能将空安瓿/废贴及时送回药房	空安瓿回收数量与发放数量不一致		运用电子药柜系统，在病区再次取药时，给与弹框提醒，上次空安瓿不回收，本次药品暂不发放。
药师定期统计回收表上记录的空安瓿/废贴的数量，销毁并记录	记录与实际回收数量不一致	不能如实登记回收数量	空安瓿回收数量与发放数量不一致		运用电子药柜系统，每次回收数量与发放数量一致时系统内记录回收。
使用记录登记	人工记录药品使用记录过于繁杂	信息化数据不完整	人工投入过多		信息系统可自动生成报表

## Sheet: 前
共线范畴	失效模式	失效原因	失效影响	PRN
医生开立医嘱，打印处方	处方信息不完整	无患者身份信息 无代办人身份信息	患者无法及时用药	7.77778
	未使用规定的红处方	医生对药品分类不清楚	患者无法及时用药	5.50926
	使用剂量不适宜	医生未按照相关规定住院患者按照日剂量开立医嘱	患者无法及时用药	13.4583
	使用频次不适宜	芬太尼透皮贴未按照72小时间隔频次给药	患者无法及时用药	13.3333
	给药途径不适宜	术中皮下注射药品开立为静脉点滴	患者无法及时用药	6.15741
	诊断不完整	处方诊断仅提取诊断1	患者无法及时用药	13.4583
护士审核，传医嘱	无病人医嘱信息	护士忘记传医嘱	患者无法及时用药	4.21296
护士携处方至药房取药	处方信息与HIS医嘱信息不一致	医生未将多余医嘱撤销 护士未将处方信息与医嘱信息核对	患者无法及时用药	11.8519
药师审核处方并计费	发药信息与处方信息不一致	药师未认真将处方信息与医嘱信息核对	护士摆药与医嘱有误，患者不能及时用药	12.2222
发放药品	药品调配错误	相似药品未区分 发药单药品信息显示不清	护士摆药与医嘱有误，患者不能及时用药	20.5833
针剂或贴剂登记回收记录表	空安瓿回收记录登记不完全	取药信息数据量大，无法实时手工记录	空安瓿回收数量与发放数量不一致	38.0926
护士取药，执行医嘱	医嘱执行错误	护士未执行“三查七对”	患者用药错误	9.62963
将空安瓿/废贴交回药房，并在回收表上做记录	使用后的空安瓿/废贴回收不完全	药品使用后不能将空安瓿/废贴及时送回药房	空安瓿回收数量与发放数量不一致	30.3472
药师定期统计回收表上记录的空安瓿/废贴的数量，销毁并记录	记录与实际回收数量不一致	不能如实登记回收数量	空安瓿回收数量与发放数量不一致	25.2778
使用记录登记	人工记录药品使用记录过于繁杂	信息化数据不完整	人工投入过多	17.5

## Sheet: 后
医生开立医嘱（医嘱前置审核），打印处方
护士审核，传医嘱
护士携处方至药房取药
药师再次审核处方
HIS计费，将医嘱信息传输电子药柜
药师根据智能药柜提示发放药品（如该科室未将上次领取的药品空安瓿/废贴上交，电子药柜系统会自动弹框提醒，拦截此次取药）
针剂或贴剂发放记录自动登记在电子药柜系统
护士取药，执行医嘱
将空安瓿/废贴交回药房
药师在电子药柜系统内将回收记录系统
定期从电子药柜系统统计空安瓿/废贴回收数量，销毁并记录
