# Supplementary material for: Proactive Risk Assessment Using Failure Mode and Effects Analysis in a Management Model of Anesthetic Drugs and Class I Psychotropic Drugs in Inpatient Pharmacy: A Pilot Project
Source: Research Square preprint supplement (doi:10.21203/rs.3.rs-6090426/v1), 2025-05-12
Supplement: Supplementary file 2 [file 7a4e2279434d182ff908edfa.xlsx]

## Sheet: Sheet1
盐酸哌替啶注射液	50mg	1037	302076
盐酸哌替啶注射液	0.1g	377
枸橼酸芬太尼注射液	0.1mg	718
盐酸氢吗啡酮注射液	2mg	23721
盐酸吗啡注射液	10mg	4245
盐酸羟考酮注射液	10mg	835
注射用盐酸瑞芬太尼	1mg	118900
枸橼酸舒芬太尼注射液	50μg	9185
注射用A型肉毒毒素	100iu	186
注射用A型肉毒毒素(保妥适）	100iu	81
亚砷酸氯化钠注射液(伊泰达)	10ml:10mg:90mg	45
注射用三氧化二砷(立生宁)	10mg	287
咪达唑仑注射液(力月西)	10mg	125746
咪达唑仑注射液	2mg	16713
芬太尼透皮贴剂	2.5mg	571	5375
芬太尼透皮贴剂	4.125mg	4517
芬太尼透皮贴剂(多瑞吉）	4.2mg	287
盐酸羟考酮缓释片	10mg	81102	99242
盐酸羟考酮缓释片	40mg	6634
硫酸吗啡缓释片	30mg	5001
磷酸可待因片	15mg	6505

## Sheet: Sheet1 (2)
咪达唑仑注射液(力月西)	10mg	125746	0.309648
注射用盐酸瑞芬太尼	1mg	118900	0.292789
盐酸羟考酮缓释片	10mg	81102	0.199712
盐酸氢吗啡酮注射液	2mg	23721	0.0584126
咪达唑仑注射液	2mg	16713	0.0411555
枸橼酸舒芬太尼注射液	50μg	9185	0.0226179
盐酸羟考酮缓释片	40mg	6634	0.0163361
磷酸可待因片	15mg	6505	0.0160185
硫酸吗啡缓释片	30mg	5001	0.0123149
芬太尼透皮贴剂	4.125mg	4517	0.011123
盐酸吗啡注射液	10mg	4245	0.0104532
盐酸哌替啶注射液	50mg	1037	0.0025536
盐酸羟考酮注射液	10mg	835	0.00205617
枸橼酸芬太尼注射液	0.1mg	718	0.00176806
芬太尼透皮贴剂	2.5mg	571	0.00140608
盐酸哌替啶注射液	0.1g	377	0.000928356
芬太尼透皮贴剂(多瑞吉）	4.2mg	287	0.000706733
		406094	1
